# Supplementary material for: In situ oxidation transformation of trimetallic selenide to amorphous FeCo-oxyhydroxide by self-sacrificing MoSe2 for efficient water oxidation
Source: Royal Society of Chemistry journal article supplement (doi:10.1039/c9ta14133b), 2020-01-01
Supplement: c9ta14133b1.pdf [file c9ta14133b1.pdf]

## Supplementary Information

*In situ* oxidation transformation of trimetallic selenide to amorphous FeCo-oxyhydroxide by self-sacrificing MoSe<sub>2</sub> for efficient water oxidation

Yu-Jia Tang,<sup>a</sup> Yu Wang,<sup>b</sup> and Kun Zhou,<sup>a,b,\*</sup>

<sup>a</sup> School of Mechanical and Aerospace Engineering, Nanyang Technological University, 50 Nanyang Avenue, Singapore 639798, Singapore

<sup>b</sup> Environmental Process Modelling Centre, Nanyang Environment and Water Research Institute, Nanyang Technological University, 1 CleanTech Loop, Singapore 637141, Singapore

\* Corresponding author

E-mail: kzhou@ntu.edu.sg

### Computational details:

The modelling results were obtained at the density functional theory plus Hubbard-U (DFT + U) level, as implemented in Vienna *ab Initio* Simulation package (VASP) code.<sup>1,2</sup> The revised Perdew–Burke–Ernzerhof exchange–correlation functional<sup>3</sup> and projector-augmented wave approach<sup>4,5</sup> were employed. Spin polarization was included in all calculations with a smearing width of 0.1 eV within the Gaussian scheme. We applied the Hubbard-U approach introduced by Dudarev and co-workers,<sup>6</sup> and the effective Hubbard-U parameter ( $U$ - $J$ ) was set as 3.52 eV for Co and 3.50 eV for Fe.<sup>7</sup> The cutoff energy was 400 eV and the  $k$ -point sampling was  $5 \times 3 \times 1$ . The convergence threshold of energy was  $1 \times 10^{-5}$  eV, and that of force on each ion was 0.02 eV Å<sup>-1</sup>. The vacuum space of slabs was kept being larger than 15 Å to keep the image interaction negligible, and the dipole correction was included in slab calculations.

The alkaline OER process typically involves the following steps:

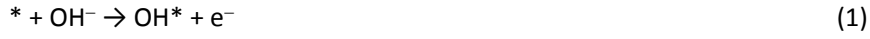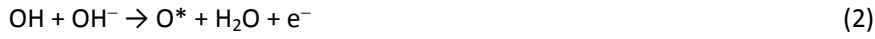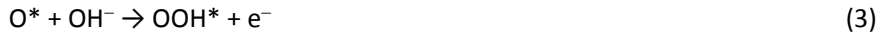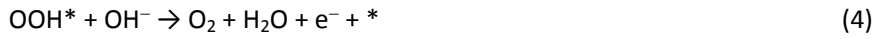

where  $*$  denotes an adsorption site.  $\text{OH}^*$ ,  $\text{O}^*$  and  $\text{OOH}^*$  are the OER intermediates. The adsorption free energies to  $\text{OH}^*$  ( $\Delta G_{\text{OH}^*}$ ),  $\text{O}^*$  ( $\Delta G_{\text{O}^*}$ ), and  $\text{OOH}^*$  ( $\Delta G_{\text{OOH}^*}$ ) are calculated as follows:

$$\Delta G_{\text{OH}^*} = G_{\text{OH}^*} - G^* - (G_{\text{H}_2\text{O}} - 1/2 G_{\text{H}_2}) \quad (5)$$

$$\Delta G_{\text{O}^*} = G_{\text{O}^*} - G^* - (G_{\text{H}_2\text{O}} - G_{\text{H}_2}) \quad (6)$$

$$\Delta G_{\text{OOH}^*} = G_{\text{OOH}^*} - G^* - (2G_{\text{H}_2\text{O}} - 3/2 G_{\text{H}_2}) \quad (7)$$

where  $G$  is the free energy of the given species, which can be deduced from the zero-point energy ( $E_{\text{ZPE}}$ ) and entropy ( $TS$ ) corrections to the DFT energy of species ( $E_{\text{DFT}}$ ). The  $E_{\text{ZPE}}$  and  $S$  of adsorbates are obtained by vibrational frequencies calculations with using harmonic vibrational motions and neglecting contributions from slab, whereas for  $\text{H}_2\text{O}$  and  $\text{H}_2$  molecules, these are taken from the NIST database (<http://cccbdb.nist.gov/>). These correction values are summarized in Table S3. The free energy change for the above four OER steps (eqs. 1–4) can be derived as follows:

$$\Delta G_1 = \Delta G_{\text{OH}^*} - eU + G_{\text{pH}} \quad (8)$$

$$\Delta G_2 = \Delta G_{\text{O}^*} - \Delta G_{\text{OH}^*} - eU + G_{\text{pH}} \quad (9)$$

$$\Delta G_3 = \Delta G_{\text{OOH}^*} - \Delta G_{\text{O}^*} - eU + G_{\text{pH}} \quad (10)$$

$$\Delta G_4 = 4.92 - \Delta G_{\text{OOH}^*} - eU + G_{\text{pH}} \quad (11)$$

where  $U$  is the electrode potential and  $G_{\text{pH}}$  is the contribution of pH derived by  $G_{\text{pH}} = -k_{\text{B}}T\ln(10) \times \text{pH}$ , according to the CHE model. Specially, the step that has the largest  $\Delta G$  value among the four  $\Delta G$  values represents the potential-limiting step. Then the theoretical overpotentials ( $\eta^*$ ) of OER can be calculated using the equation:

$$\eta^{\ddagger} = \max \{ \Delta G_1, \Delta G_2, \Delta G_3, \Delta G_4 \} / e - 1.23 \text{ V} \quad (12)$$

Note that the calculated  $\eta^{\ddagger}$  is only a thermodynamic quantity, but it has been found to scale well with experimentally measured overpotential.<sup>8</sup>

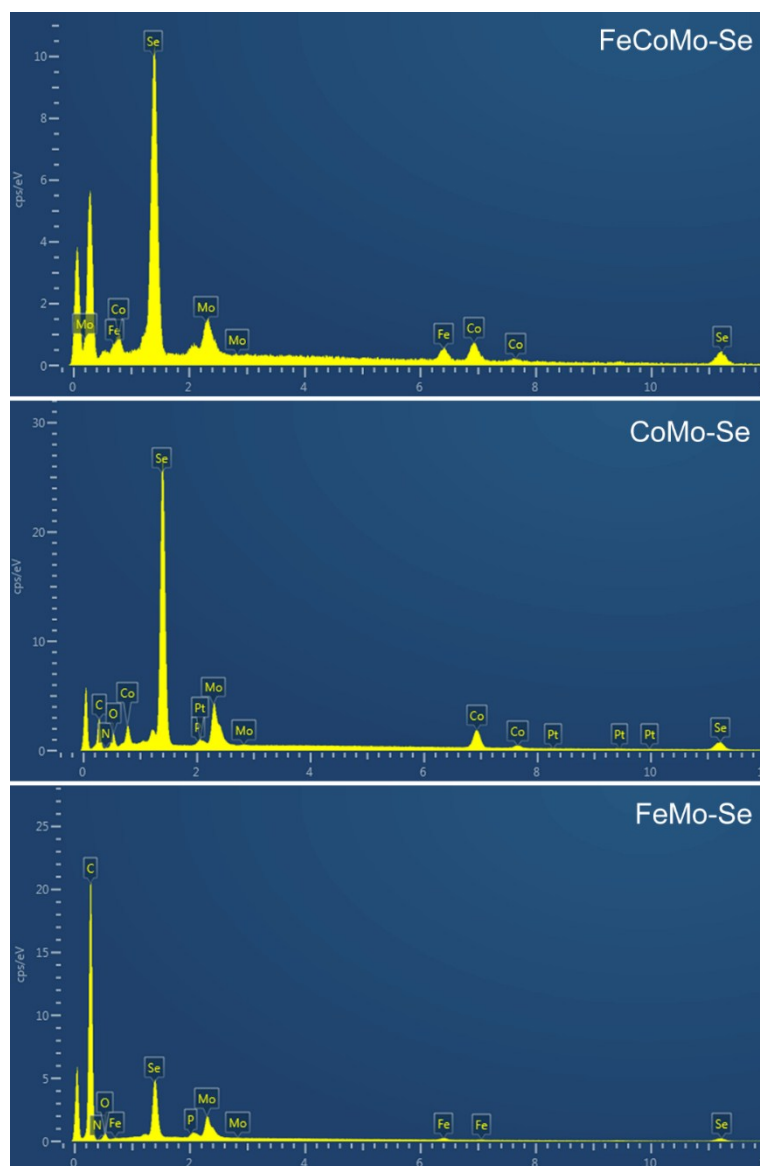

**Figure S1.** EDX spectra of the as-prepared selenide samples of FeCoMo-Se, CoMo-Se and FeMo-Se.

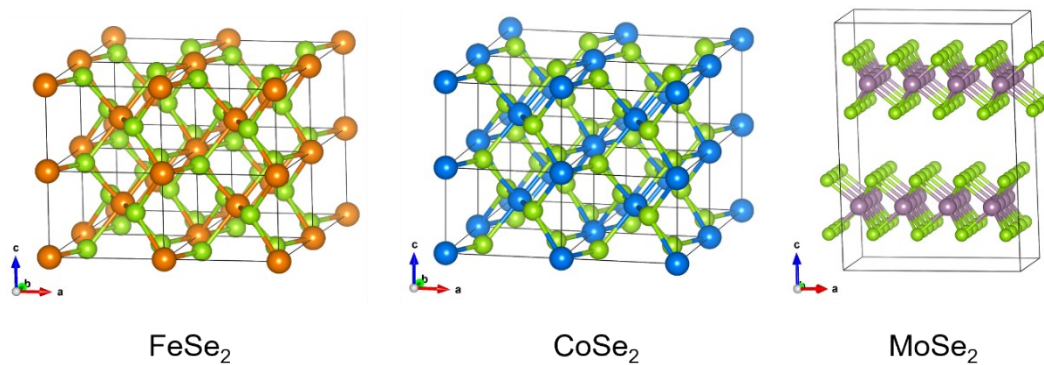

**Figure S2.** Geometric structures of  $\text{FeSe}_2$ ,  $\text{CoSe}_2$  and  $\text{MoSe}_2$ , where Fe, Co, Mo, and Se are represented by orange, blue, purple and green balls, respectively.

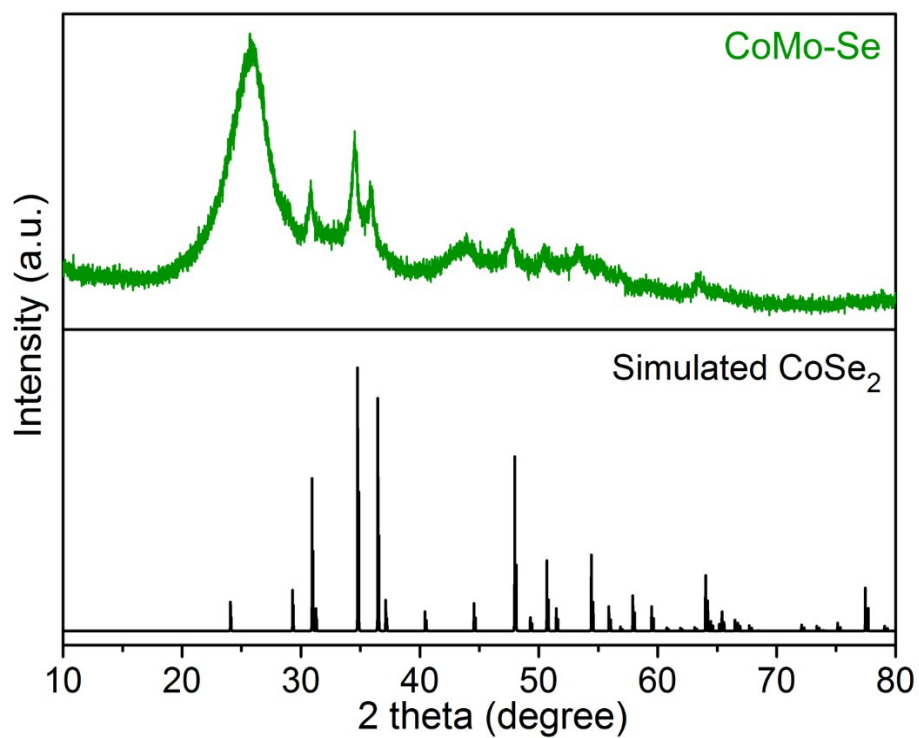

**Figure S3.** PXRD pattern of CoMo-Se and the simulated one of  $\text{CoSe}_2$ .

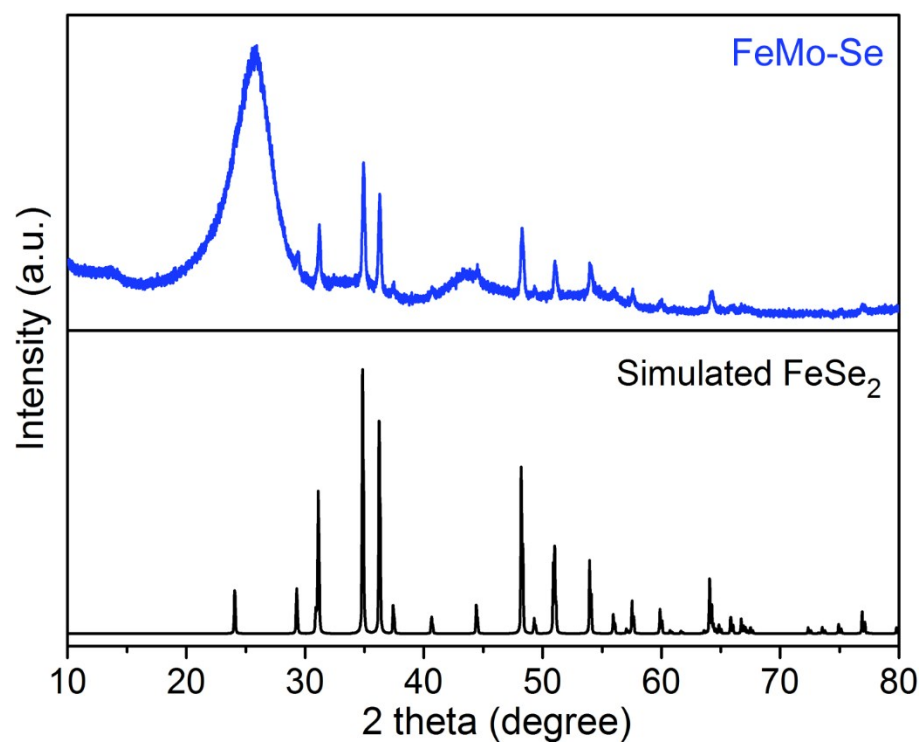

**Figure S4.** PXRD pattern of FeMo-Se and the simulated one of FeSe<sub>2</sub>.

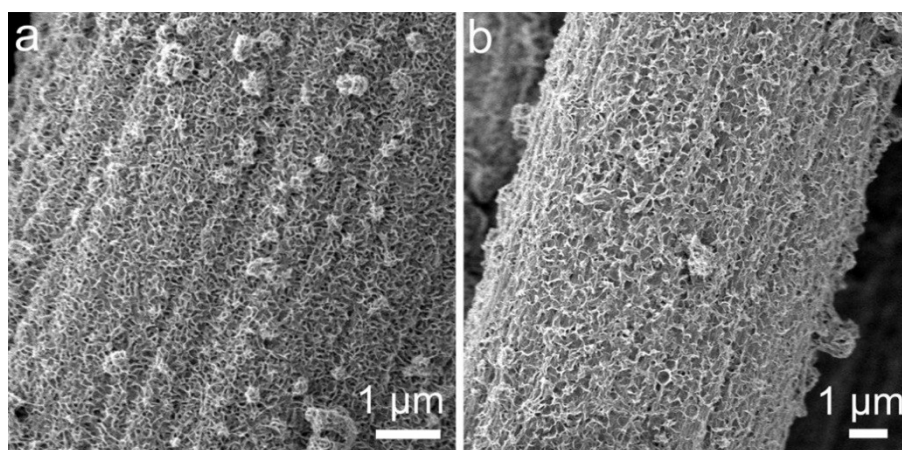

**Figure S5.** SEM images of (a) CoMo-Se and (b) FeMo-Se.

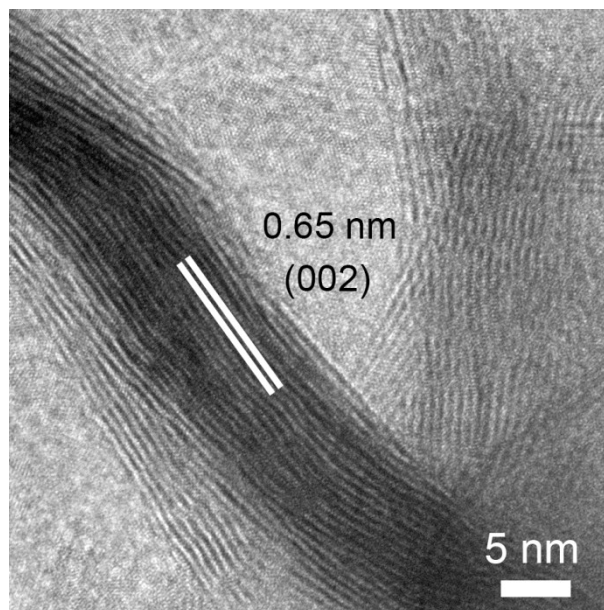

**Figure S6.** HRTEM image of MoSe<sub>2</sub> ultrasonicated from the CC substrate.

MoSe<sub>2</sub> on the CC substrate was synthesized using a similar hydrothermal method without adding Co(NO<sub>3</sub>)<sub>2</sub>·6H<sub>2</sub>O and FeCl<sub>3</sub>. HRTEM image shows that MoSe<sub>2</sub> possesses a multilayer structure with an interplanar distance of 0.65 nm for the (002) plane, which is in accordance with the pristine MoSe<sub>2</sub>.

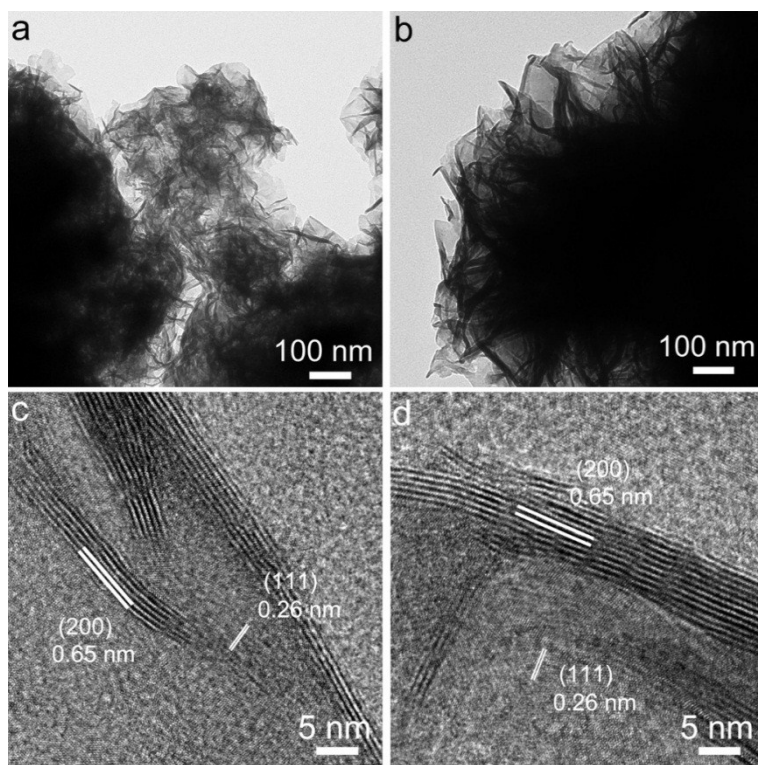

**Figure S7.** TEM images of (a) CoMo-Se and (b) FeMo-Se ultrasonicated from the CC substrate. HRTEM images of (c) CoMo-Se and (d) FeMo-Se ultrasonicated from the CC substrate.

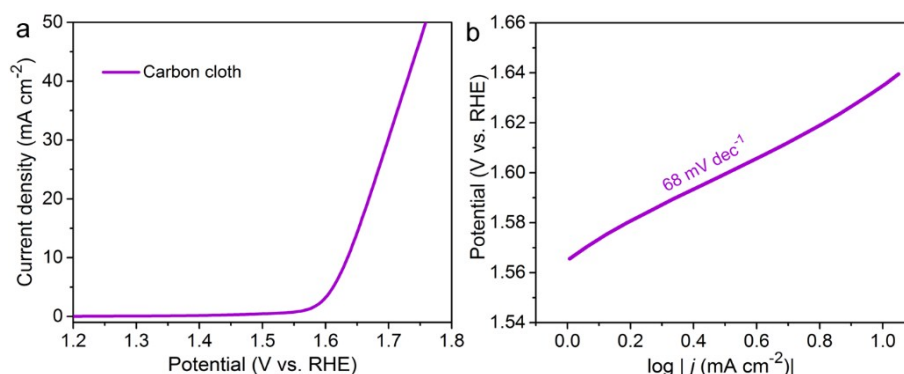

**Figure S8.** Electrochemical activity of the treated carbon cloth substrate for OER: (a) LSV curve and (b) Tafel plot.

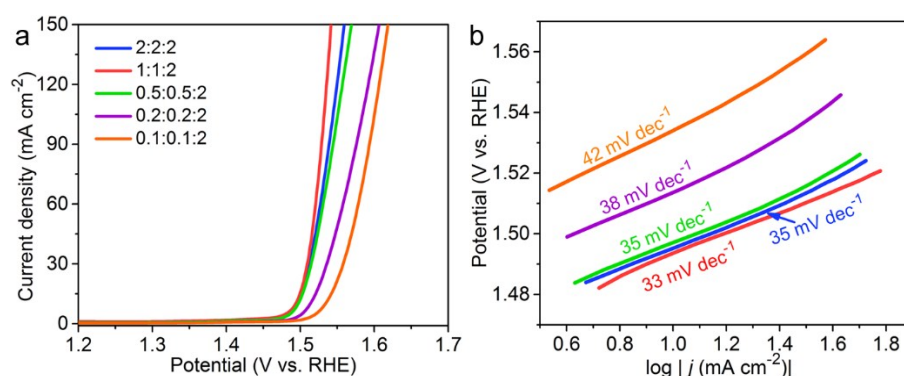

**Figure S9.** Electrochemical activity of the trimetallic selenides synthesized with different molar ratios of Fe, Co and Mo in precursors for OER: (a) LSV curves and (b) Tafel plots.

Different mol ratios of Fe, Co and Mo in the precursors, *i.e.*, 2:2:2, 1:1:2, 0.5:0.5:2, 0.2:0.2:2 and 0.1:0.1:2, were chosen to select the optimum synthesis condition for the trimetallic selenides. According to the LSV curves and Tafel slopes, the trimetallic selenide with the mol ratio of 1:1:2 in the precursor had the best OER performance among all the as-prepared MoSe<sub>2</sub>-containing trimetallic selenide catalysts.

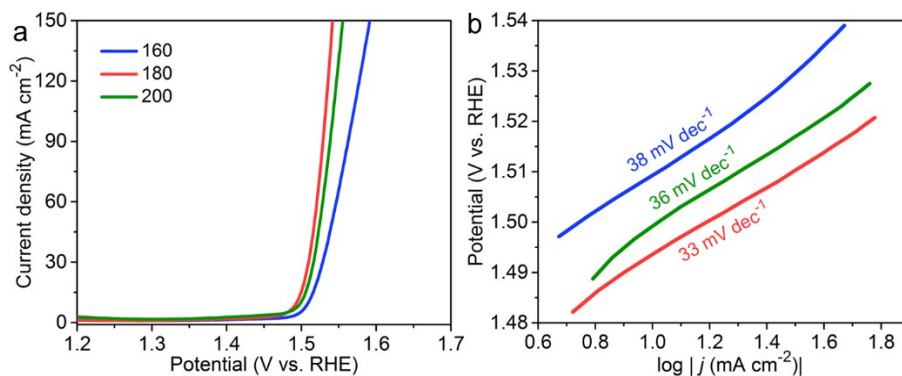

**Figure S10.** Electrochemical activity of the trimetallic selenides synthesized at different hydrothermal temperatures (160, 180 and 200 °C) for OER: (a) LSV curves and (b) Tafel plots.

The trimetallic selenides were prepared by adjusting the hydrothermal temperatures (160, 180 and 200 °C). The trimetallic selenide prepared at 180 °C showed the lowest  $\eta_{10}$  and Tafel slope among all the selenide samples.

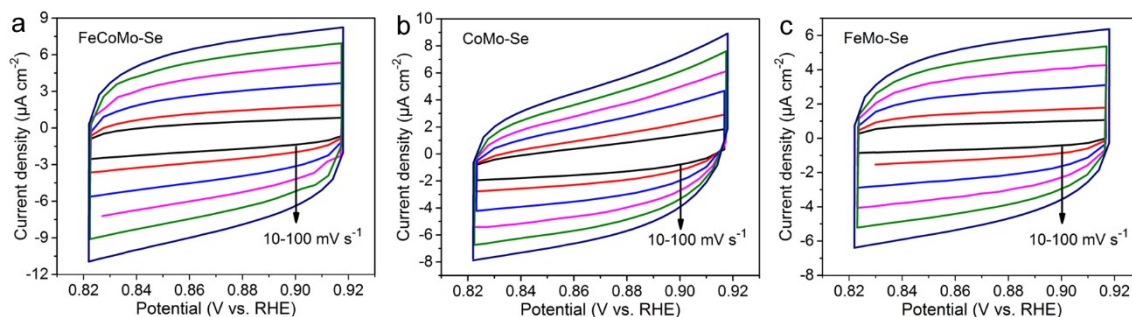

**Figure S11.** CV curves of (a) FeCoMo-Se, (b) CoMo-Se and (c) FeMo-Se loaded onto GCE obtained in a potential range from 0.82 to 0.92 V vs. RHE at the different scan rates (10, 20, 40, 60, 80 and 100 mV s<sup>-1</sup>).



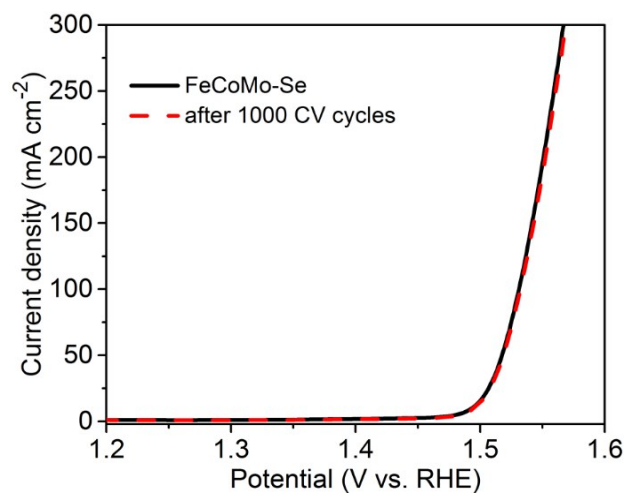

**Figure S12.** LSV curves of FeCoMo-Se before and after 1000 CV cycles stability testing for OER.

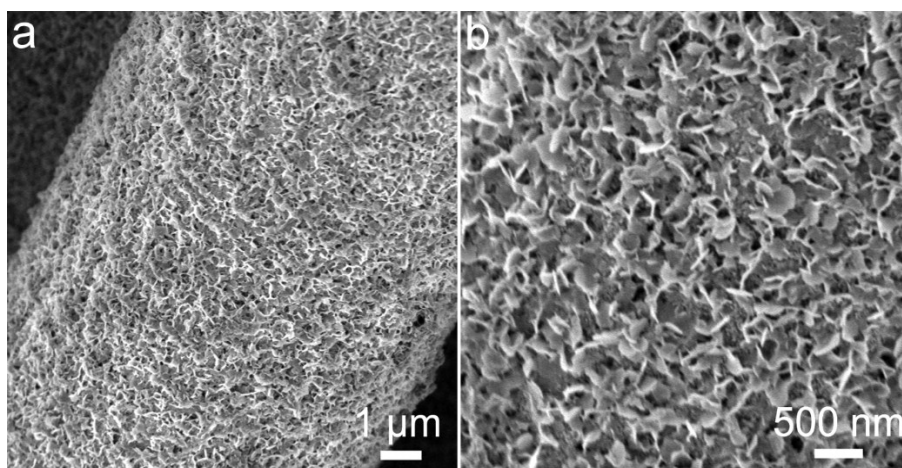

**Figure S13.** Low- and high-magnification SEM images of FeCoMo-Se after 1000 CV cycles stability testing in 1 M KOH for OER.

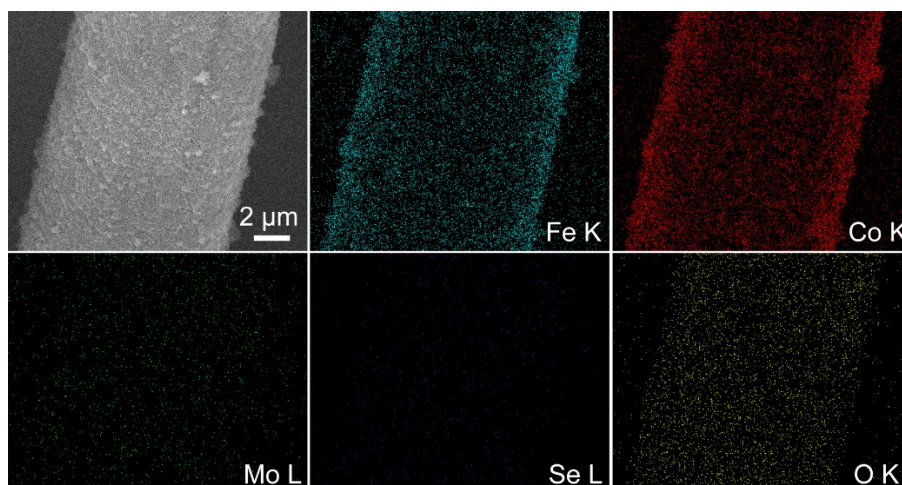

**Figure S14.** EDX element mapping images of Fe, Co, Mo, Se and O of FeCoMo-Se after 1000 CV cycles stability testing in 1 M KOH for OER.

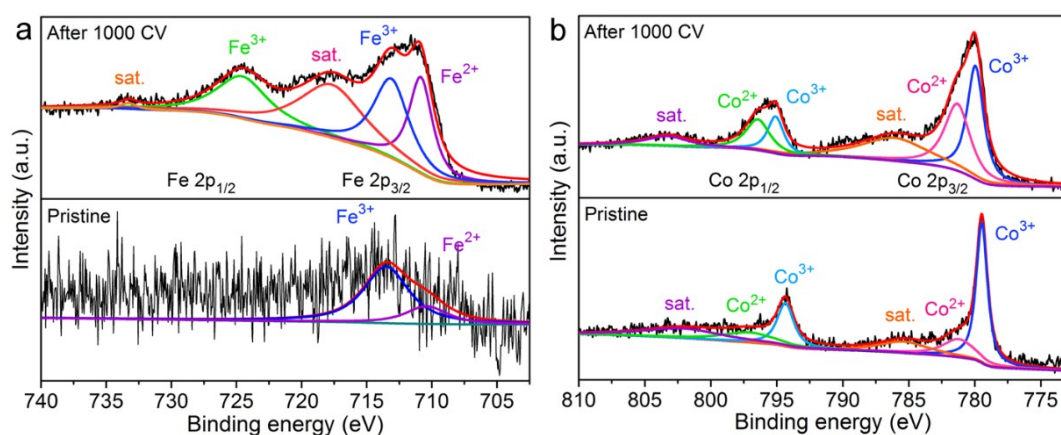

**Figure S15.** High-resolution XPS spectra of FeCoMo-Se before and after stability testing in 1 M KOH for OER: (a) Fe 2p and (b) Co 2p.

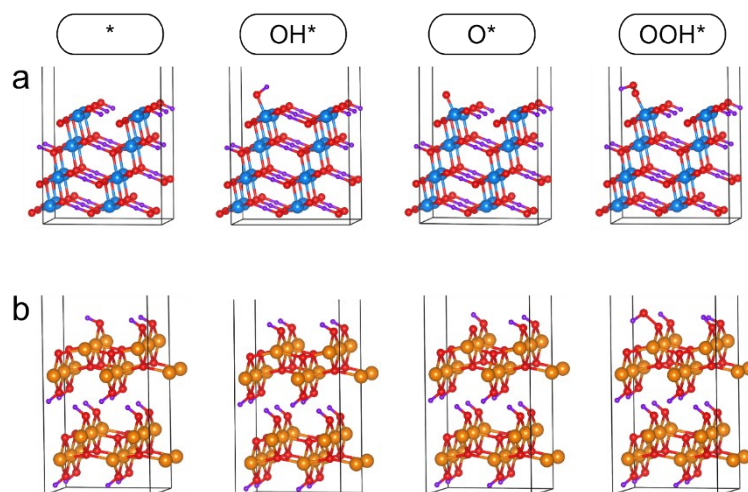

**Figure S16.** Optimized structures of intermediates for OER on (a) Co-oxyhydroxide and (b) Fe-oxyhydroxide. Co, Fe, O, and H are represented by blue, orange, red, and purple balls, respectively.

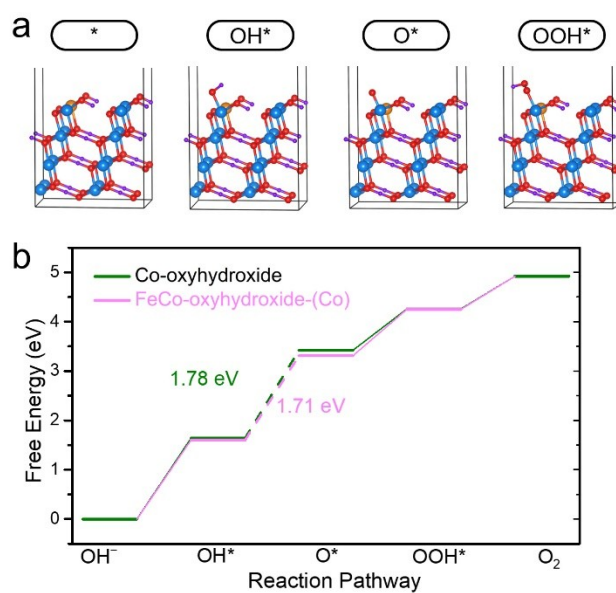

**Figure S17.** (a) Optimized structures of intermediates of OER on the Co site of FeCo-oxyhydroxide and (b) the free energy diagram for OER on the Co sites of FeCo-oxyhydroxide and pristine Co-oxyhydroxide. The dashed lines denote the potential-limiting steps. The numbers represent the values of free energy change of the potential-limiting steps.

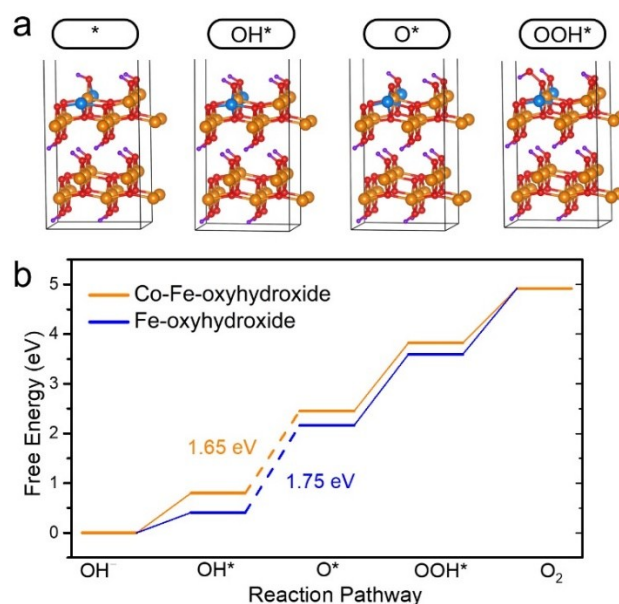

**Figure S18.** (a) Optimized structures of intermediates of Co-Fe-oxyhydroxide and (b) the free energy diagram for OER on Co-Fe-oxyhydroxide and pristine Fe-oxyhydroxide. Co-Fe-oxyhydroxide was constructed by introducing a Co dopant into Fe-oxyhydroxide. The dashed lines denote the potential-limiting steps. The numbers represent the values of free energy change of the potential-limiting steps. It was found that Co-Fe-oxyhydroxide (1.65 eV) and Fe-oxyhydroxide (1.75 eV) have the same potential-limiting step,  $\text{O}^*$  formation step, and Co-Fe-oxyhydroxide exhibits higher OER activity than Fe-oxyhydroxide.

**Table S1.** Comparison of OER performances of FeCoMo-Se and recently reported transition-metal-based selenide and (oxy)hydroxide electrocatalysts.

| Electrocatalyst                                                   | Substrate                    | Electrolyte    | $\eta_{10}$ (mV) | Tafel Slope<br>(mV dec <sup>-1</sup> ) | Reference        |
|-------------------------------------------------------------------|------------------------------|----------------|------------------|----------------------------------------|------------------|
| <b>FeCoMo-Se</b>                                                  | <b>Carbon cloth</b>          | <b>1 M KOH</b> | <b>264</b>       | <b>33</b>                              | <b>This work</b> |
| $\text{Ni}_x\text{Fe}_{1-x}\text{Se}_2\text{-DO}$                 | Ni foam                      | 1 M KOH        | 195              | 28                                     | 9                |
| $\text{ECT-Se-Co}_{0.37}\text{Ni}_{0.26}\text{Fe}_{0.37}\text{O}$ | Carbon fiber cloth           | 1 M KOH        | 243              | 35.1                                   | 10               |
| $(\text{Ni},\text{Co})\text{Se}_2$                                | Carbon cloth                 | 1 M KOH        | 256              | 74                                     | 11               |
| NiFe-LDH                                                          | Glassy carbon                | 1 M KOH        | 270              | 36.2                                   | 12               |
| $(\text{Co}_{0.21}\text{Ni}_{0.25}\text{Cu}_{0.54})_3\text{Se}_2$ | Au-coated glass<br>substrate | 1 M KOH        | 272              | 53.5                                   | 13               |
| Mo intercalated NiFe LDH                                          | Glassy carbon                | 1 M KOH        | 280              | 40                                     | 14               |
| Ni-Fe LDH                                                         | Glassy carbon                | 1 M KOH        | 280              | 49.4                                   | 15               |

|                                                |               |         |     |      |    |
|------------------------------------------------|---------------|---------|-----|------|----|
| $\text{Co}(\text{S}_{0.22}\text{Se}_{0.78})_2$ | Ni foam       | 1 M KOH | 283 | 65.6 | 16 |
| $\text{FeOOH}(\text{Se})$                      | Iron foam     | 1 M KOH | 287 | 54   | 17 |
| $\alpha\text{-Co}_4\text{Fe}(\text{OH})_x$     | Glassy carbon | 1 M KOH | 295 | 52   | 18 |
| CoZn-Se                                        | Glassy carbon | 1 M KOH | 320 | 66   | 19 |
| Fe-CoOOH/G                                     | Glassy carbon | 1 M KOH | 330 | 37   | 20 |

**Table S2.** Calculated adsorption free energies of intermediates of the studied systems.

|                                      | Co-oxyhydroxide | FeCo-oxyhydroxide (Co site) | Fe-oxyhydroxide | Co-Fe-oxyhydroxide | FeCo-oxyhydroxide (Fe site) |
|--------------------------------------|-----------------|-----------------------------|-----------------|--------------------|-----------------------------|
| $\Delta G_{\text{OH}^*}(\text{eV})$  | 1.64            | 1.60                        | 0.41            | 0.80               | 1.52                        |
| $\Delta G_{\text{O}^*}(\text{eV})$   | 3.42            | 3.31                        | 2.16            | 2.45               | 2.92                        |
| $\Delta G_{\text{OOH}^*}(\text{eV})$ | 4.26            | 4.26                        | 3.59            | 3.82               | 4.16                        |

**Table S3.** Calculated zero-point energy correction ( $E_{\text{ZPE}}$ ), entropy contribution ( $TS$ ), and the total free energy correction ( $G - E_{\text{DFT}}$ ) of the studied systems.

| Species                             | $E_{\text{ZPE}}$ | $-TS$ | $G - E_{\text{DFT}}$ |
|-------------------------------------|------------------|-------|----------------------|
| $\text{H}_2$                        | 0.27             | -0.40 | -0.13                |
| $\text{H}_2\text{O}$                | 0.56             | -0.67 | -0.11                |
| $\text{OH}^*$ on Co-oxyhydroxide    | 0.35             | -0.10 | 0.25                 |
| $\text{OH}^*$ on Fe-oxyhydroxide    | 0.37             | -0.07 | 0.30                 |
| $\text{OH}^*$ on FeCo-oxyhydroxide  | 0.35             | -0.10 | 0.25                 |
| $\text{O}^*$ on Co-oxyhydroxide     | 0.07             | -0.05 | 0.02                 |
| $\text{O}^*$ on Fe-oxyhydroxide     | 0.07             | -0.04 | 0.03                 |
| $\text{O}^*$ on FeCo-oxyhydroxide   | 0.08             | -0.05 | 0.03                 |
| $\text{OOH}^*$ on Co-oxyhydroxide   | 0.47             | -0.14 | 0.33                 |
| $\text{OOH}^*$ on Fe-oxyhydroxide   | 0.46             | -0.14 | 0.32                 |
| $\text{OOH}^*$ on FeCo-oxyhydroxide | 0.46             | -0.14 | 0.32                 |

## References

- 1 G. Kresse and J. Hafner, *Phys. Rev. B*, 1993, **47**, 558.
- 2 G. Kresse and J. Furthmüller, *Comp. Mate. Sci.*, 1996, **6**, 15-50.
- 3 B. Hammer, L. B. Hansen and J. K. Nørskov, *Phys. Rev. B*, 1999, **59**, 7413.
- 4 P. E. Blöchl, *Phys. Rev. B*, 1994, **50**, 17953.
- 5 G. Kresse and D. Joubert, *Phys. Rev. B*, 1999, **59**, 1758.
- 6 S. Dudarev, G. Botton, S. Savrasov, C. Humphreys and A. Sutton, *Phys. Rev. B*, 1998, **57**, 1505.
- 7 M. García-Mota, M. Bajdich, V. Viswanathan, A. Vojvodic, A. T. Bell and J. K. Nørskov, *J. Phys. Chem. C*, 2012, **116**, 21077-21082.
- 8 I. C. Man, H. Y. Su, F. Calle-Vallejo, H. A. Hansen, J. I. Martínez, N. G. Inoglu, J. Kitchin, T. F. Jaramillo, J. K. Nørskov and J. Rossmeisl, *ChemCatChem*, 2011, **3**, 1159-1165.
- 9 X. Xu, F. Song and X. Hu, *Nat. Commun.*, 2016, **7**, 12324.
- 10 W. Chen, Y. Liu, Y. Li, J. Sun, Y. Qiu, C. Liu, G. Zhou and Y. Cui, *Nano Lett.*, 2016, **16**, 7588-7596.
- 11 W. Song, X. Teng, Y. Liu, J. Wang, Y. Niu, X. He, C. Zhang and Z. Chen, *Nanoscale*, 2019, **11**, 6401-6409.
- 12 D. Zhou, S. Wang, Y. Jia, X. Xiong, H. Yang, S. Liu, J. Tang, J. Zhang, D. Liu, L. Zheng, Y. Kuang, X. Sun and B. Liu, *Angew. Chem. Int. Ed.*, 2019, **131**, 746-750.
- 13 X. Cao, E. Johnson and M. Nath, *J. Mater. Chem. A*, 2019, **7**, 9877-9889.
- 14 N. Han, F. Zhao and Y. Li, *J. Mater. Chem. A*, 2015, **3**, 16348-16353.
- 15 L. Yu, J. F. Yang, B. Y. Guan, Y. Lu and X. W. Lou, *Angew. Chem. Int. Ed.*, 2018, **57**, 172-176.
- 16 L. Fang, W. Li, Y. Guan, Y. Feng, H. Zhang, S. Wang and Y. Wang, *Adv. Funct. Mater.*, 2017, **27**, 1701008.
- 17 S. Niu, W.-J. Jiang, Z. Wei, T. Tang, J. Ma, J.-S. Hu and L.-J. Wan, *J. Am. Chem. Soc.*, 2019, **141**, 7005-7013.
- 18 H. Jin, S. Mao, G. Zhan, F. Xu, X. Bao and Y. Wang, *J. Mater. Chem. A*, 2017, **5**, 1078-1084.
- 19 G. Fang, Q. Wang, J. Zhou, Y. Lei, Z. Chen, Z. Wang, A. Pan and S. Liang, *ACS Nano*, 2019, **13**, 5635-5645.
- 20 X. Han, C. Yu, S. Zhou, C. Zhao, H. Huang, J. Yang, Z. Liu, J. Zhao and J. Qiu, *Adv. Energy Mater.*, 2017, **7**, 1602148.
